# Supplementary material for: Associations between Perceptions and Measures of Weather and Walking, United States—2015
Source: MDPI journal article supplement (doi:10.3390/ijerph18168398), 2021-08-09
Supplement: s1 [file s1]

## Supplemental Tables

**Table S1. Prevalence and volume of transportation walking by weather as a barrier and monthly Humidex quintile.**

| Characteristics                             | Participation |           |                      |                  |                      |                  | Volume Among Adults Transportation Walking |           |                      |                  |                      |                  |
|---------------------------------------------|---------------|-----------|----------------------|------------------|----------------------|------------------|--------------------------------------------|-----------|----------------------|------------------|----------------------|------------------|
|                                             | %             | 95% CI    | Model 1 <sup>a</sup> |                  | Model 2 <sup>b</sup> |                  | min/wk                                     |           | Model 1 <sup>a</sup> |                  | Model 2 <sup>b</sup> |                  |
|                                             |               |           | PR                   | 95% CI           | PR                   | 95% CI           | Mean                                       | 95% CI    | VR                   | 95% CI           | VR                   | 95% CI           |
| Total                                       | 31.5          | 30.7-32.4 | --                   |                  | --                   |                  | 59.3                                       | 57.6-61.0 | --                   |                  | --                   |                  |
| Frequency of reporting weather as a barrier |               |           |                      |                  |                      |                  |                                            |           |                      |                  |                      |                  |
| Almost always                               | 23.2          | 21.7-24.7 | 1.00                 | Referent         | 1.00                 | Referent         | 51.2                                       | 47.5-54.8 | 1.00                 | Referent         | 1.00                 | Referent         |
| Most of the time                            | 32.0          | 29.8-34.1 | <b>1.30</b>          | <b>1.19-1.42</b> | <b>1.30</b>          | <b>1.18-1.41</b> | 50.5                                       | 47.1-54.0 | 1.00                 | 0.91-1.1         | 1.00                 | 0.91-1.1         |
| Some of the time                            | 35.2          | 33.7-36.8 | <b>1.42</b>          | <b>1.31-1.52</b> | <b>1.41</b>          | <b>1.31-1.52</b> | 58.4                                       | 55.4-61.3 | <b>1.15</b>          | <b>1.04-1.25</b> | <b>1.14</b>          | <b>1.04-1.25</b> |
| A little of the time                        | 40.2          | 38.1-42.3 | <b>1.58</b>          | <b>1.46-1.71</b> | <b>1.58</b>          | <b>1.45-1.70</b> | 64.6                                       | 60.3-68.9 | <b>1.29</b>          | <b>1.16-1.41</b> | <b>1.28</b>          | <b>1.16-1.41</b> |
| Never                                       | 28.8          | 27.2-30.4 | <b>1.16</b>          | <b>1.07-1.25</b> | <b>1.15</b>          | <b>1.06-1.24</b> | 68.6                                       | 64.3-73.0 | <b>1.35</b>          | <b>1.22-1.47</b> | <b>1.35</b>          | <b>1.22-1.47</b> |
| Humidex quintile <sup>c</sup>               |               |           |                      |                  |                      |                  |                                            |           |                      |                  |                      |                  |
| 1                                           | 30.0          | 28.1-31.9 | 1.00                 | Referent         | 1.00                 | Referent         | 57.5                                       | 53.7-61.2 | 1.00                 | Referent         | 1.00                 | Referent         |
| 2                                           | 34.9          | 32.8-37.1 | <b>1.13</b>          | <b>1.04-1.23</b> | <b>1.11</b>          | <b>1.01-1.20</b> | 60.4                                       | 56.5-64.4 | 1.05                 | 0.95-1.15        | 1.04                 | 0.94-1.13        |
| 3                                           | 32.0          | 30.1-34.0 | 1.05                 | 0.96-1.14        | 1.03                 | 0.94-1.12        | 60.5                                       | 56.9-64.2 | 1.05                 | 0.95-1.14        | 1.03                 | 0.93-1.12        |
| 4                                           | 32.2          | 30.1-34.4 | 1.07                 | 0.98-1.16        | 1.05                 | 0.96-1.14        | 59.2                                       | 55.2-63.3 | 1.04                 | 0.94-1.14        | 1.01                 | 0.92-1.11        |
| 5                                           | 28.4          | 26.6-30.2 | 1.05                 | 0.96-1.14        | 1.04                 | 0.95-1.13        | 58.6                                       | 54.3-62.9 | 1.03                 | 0.91-1.14        | 1.01                 | 0.90-1.12        |

PR, Prevalence ratio; VR, Volume ratio

Boldface indicates statistical significance ( $p < 0.05$ ).

<sup>a</sup>Model 1 includes sex, age group, race/ethnicity, education level, expanded region, urban-rural designation, and the weather variable of interest.

<sup>b</sup>Model 2 includes all demographic and geographic variables in model 1 and both measures of weather.

<sup>c</sup>Upper bounds for Humidex quintiles are: 1: 4.580; 2: 11.911; 3: 20.491; 4: 26.701.

**Table S2. Prevalence and volume of leisure walking by weather as a barrier to walking and monthly Humidex quintile.**

| Characteristics                             | Participation |           |                       |                  | Volume Among Adults Leisure Walking |            |                       |                  |
|---------------------------------------------|---------------|-----------|-----------------------|------------------|-------------------------------------|------------|-----------------------|------------------|
|                                             | %             | 95% CI    | Adjusted <sup>a</sup> |                  | min/wk                              |            | Adjusted <sup>a</sup> |                  |
|                                             |               |           | PR                    | 95% CI           | Mean                                | 95% CI     | VR                    | 95% CI           |
| Total                                       | 31.5          | 30.7-32.4 | --                    |                  | 59.3                                | 57.6-61.0  | --                    |                  |
| Frequency of reporting weather as a barrier |               |           |                       |                  |                                     |            |                       |                  |
| Almost always                               | 41.8          | 40.0-43.6 | 1.00                  | Referent         | 63.6                                | 60.5-66.6  | 1.00                  | Referent         |
| Most of the time                            | 52.9          | 50.6-55.2 | <b>1.23</b>           | <b>1.16-1.3</b>  | 66.5                                | 62.9-70.0  | 1.06                  | 0.99-1.14        |
| Some of the time                            | 61.8          | 60.2-63.3 | <b>1.41</b>           | <b>1.35-1.48</b> | 78.3                                | 75.6-81.1  | <b>1.25</b>           | <b>1.17-1.32</b> |
| A little of the time                        | 66.7          | 64.7-68.7 | <b>1.51</b>           | <b>1.43-1.59</b> | 92.2                                | 87.9-96.5  | <b>1.47</b>           | <b>1.38-1.57</b> |
| Never                                       | 40.4          | 38.7-42.0 | 0.94                  | 0.89-0.99        | 97.9                                | 93.5-102.3 | <b>1.58</b>           | <b>1.47-1.69</b> |
| Humidex quintile <sup>b</sup>               |               |           |                       |                  |                                     |            |                       |                  |
| 1                                           | 45.8          | 43.9-47.7 | 1.00                  | Referent         | 75.3                                | 71.6-78.9  | 1.00                  | Referent         |
| 2                                           | 53.5          | 51.4-55.5 | <b>1.15</b>           | <b>1.09-1.21</b> | 78.7                                | 75.0-82.4  | 1.05                  | 0.98-1.12        |
| 3                                           | 55.2          | 53.2-57.2 | <b>1.17</b>           | <b>1.11-1.24</b> | 81.2                                | 77.7-84.7  | <b>1.08</b>           | <b>1.01-1.16</b> |
| 4                                           | 56.5          | 54.7-58.3 | <b>1.22</b>           | <b>1.16-1.28</b> | 82.0                                | 78.3-85.7  | <b>1.10</b>           | <b>1.03-1.18</b> |
| 5                                           | 49.5          | 47.5-51.6 | <b>1.12</b>           | <b>1.06-1.19</b> | 80.6                                | 76.8-84.4  | <b>1.11</b>           | <b>1.03-1.19</b> |

PR, Prevalence ratio; VR, Volume ratio

Boldface indicates statistical significance ( $p<0.05$ ).

<sup>a</sup>Model includes sex, age group, race/ethnicity, education level, expanded region, urban-rural designation, and the weather variable of interest.

<sup>b</sup>Upper bounds for Humidex quintiles: 1: 4.580; 2: 11.911; 3: 20.491; 4: 26.701.

**Table S3. Prevalence and volume of leisure walking by weather as a barrier and monthly Humidex quintile.**

| Frequency of reporting weather as a barrier by humidex quintile <sup>b</sup> | Participation |           |                       |                  | Volume Among Adults Leisure Walking |            |                       |                  |
|------------------------------------------------------------------------------|---------------|-----------|-----------------------|------------------|-------------------------------------|------------|-----------------------|------------------|
|                                                                              | %             | 95%CI     | Adjusted <sup>a</sup> |                  | min/week                            |            | Adjusted <sup>a</sup> |                  |
|                                                                              |               |           | PR                    | 95% CI           | Mean                                | 95%CI      | VR                    | 95% CI           |
| Almost always                                                                |               |           |                       |                  |                                     |            |                       |                  |
| 1                                                                            | 32.0          | 29.0-35.2 | 1.00                  | Referent         | 53.8                                | 47.4-60.1  | 1.00                  | Referent         |
| 2                                                                            | 44.9          | 40.9-49.0 | <b>1.43</b>           | <b>1.24-1.62</b> | 60.0                                | 53.8-66.2  | <b>1.14</b>           | <b>0.96-1.31</b> |
| 3                                                                            | 47.0          | 42.7-51.3 | <b>1.50</b>           | <b>1.29-1.71</b> | 66.9                                | 58.8-75.0  | <b>1.31</b>           | <b>1.10-1.53</b> |
| 4                                                                            | 48.8          | 44.3-53.4 | <b>1.57</b>           | <b>1.36-1.78</b> | 70.6                                | 63.7-77.5  | <b>1.36</b>           | <b>1.15-1.56</b> |
| 5                                                                            | 40.9          | 37.0-44.9 | <b>1.34</b>           | <b>1.15-1.54</b> | 67.9                                | 61.1-74.8  | <b>1.32</b>           | <b>1.10-1.54</b> |
| Most of the time                                                             |               |           |                       |                  |                                     |            |                       |                  |
| 1                                                                            | 46.1          | 41.8-50.5 | 1.00                  | Referent         | 59.1                                | 51.9-66.2  | 1.00                  | Referent         |
| 2                                                                            | 55.1          | 50.2-59.9 | <b>1.15</b>           | <b>1.01-1.30</b> | 67.5                                | 59.1-75.9  | 1.14                  | 0.95-1.34        |
| 3                                                                            | 58.4          | 53.2-63.4 | <b>1.26</b>           | <b>1.10-1.41</b> | 69.5                                | 62.2-76.9  | 1.15                  | 0.97-1.33        |
| 4                                                                            | 56.6          | 51.4-61.6 | 1.19                  | 1.04-1.34        | 70.1                                | 61.6-78.5  | 1.18                  | 0.98-1.39        |
| 5                                                                            | 51.2          | 46.2-56.1 | 1.11                  | 0.95-1.27        | 68.1                                | 59.9-76.4  | 1.13                  | 0.93-1.34        |
| Some of the time                                                             |               |           |                       |                  |                                     |            |                       |                  |
| 1                                                                            | 56.4          | 53.2-59.6 | 1.00                  | Referent         | 77.7                                | 72.3-83.2  | 1.00                  | Referent         |
| 2                                                                            | 60.7          | 57.0-64.3 | 1.05                  | 0.97-1.14        | 80.2                                | 74.0-86.3  | 1.02                  | 0.92-1.13        |
| 3                                                                            | 63.5          | 60.1-66.7 | <b>1.10</b>           | <b>1.02-1.18</b> | 78.8                                | 72.7-84.8  | 1.02                  | 0.91-1.14        |
| 4                                                                            | 66.6          | 63.2-69.9 | <b>1.16</b>           | <b>1.08-1.25</b> | 79.1                                | 72.8-85.4  | 1.01                  | 0.90-1.12        |
| 5                                                                            | 61.7          | 58.1-65.3 | <b>1.11</b>           | <b>1.02-1.20</b> | 75.6                                | 69.1-82.1  | 0.98                  | 0.87-1.10        |
| A little of the time                                                         |               |           |                       |                  |                                     |            |                       |                  |
| 1                                                                            | 64.3          | 59.2-69.0 | 1.00                  | Referent         | 95.7                                | 85.7-105.7 | 1.00                  | Referent         |
| 2                                                                            | 68.8          | 64.5-72.8 | 1.08                  | 0.98-1.19        | 92.4                                | 82.0-102.7 | 1.00                  | 0.85-1.15        |
| 3                                                                            | 67.4          | 63.1-71.3 | 1.05                  | 0.95-1.16        | 93.5                                | 85.2-101.8 | 1.00                  | 0.85-1.14        |
| 4                                                                            | 68.5          | 64.1-72.6 | 1.09                  | 0.98-1.20        | 88.3                                | 78.6-98.0  | 0.94                  | 0.80-1.08        |
| 5                                                                            | 63.8          | 58.8-68.4 | 1.08                  | 0.97-1.19        | 92.6                                | 82.9-102.3 | 1.01                  | 0.85-1.17        |
| Never                                                                        |               |           |                       |                  |                                     |            |                       |                  |
| 1                                                                            | 38.1          | 34.2-42.2 | 1.00                  | Referent         | 107.4                               | 93.8-121.0 | 1.00                  | Referent         |

|   |      |           |      |           |       |            |      |           |
|---|------|-----------|------|-----------|-------|------------|------|-----------|
| 2 | 39.9 | 36.1-43.8 | 0.95 | 0.82-1.07 | 93.3  | 83.1-103.5 | 0.91 | 0.76-1.06 |
| 3 | 43.3 | 40.0-46.7 | 0.95 | 0.83-1.07 | 90.8  | 83.1-98.5  | 0.91 | 0.76-1.06 |
| 4 | 43.5 | 40.1-47.0 | 1.06 | 0.93-1.19 | 98.9  | 90.1-107.6 | 1.01 | 0.85-1.17 |
| 5 | 35.8 | 32.3-39.5 | 0.93 | 0.80-1.07 | 104.3 | 92.4-116.2 | 1.05 | 0.86-1.24 |

PR, Prevalence ratio; VR, Volume ratio

Boldface indicates statistical significance ( $p<0.05$ ).

<sup>a</sup>Models include sex, age group, race/ethnicity, education level, expanded region, urban-rural designation, and temperature, and models are stratified by reported weather as a barrier to walking.

<sup>b</sup>Upper bounds for Humidex quintiles: 1: 4.580; 2: 11.911; 3: 20.491; 4: 26.701.
